1 **Evidence that population increase and range expansion by**  
2 **Eurasian Sparrowhawks has impacted avian prey populations**

3

4 Christopher Paul Bell

## 5 **Abstract**

6 The role of increased predator numbers in the general decline of bird populations in the late  
7 20<sup>th</sup> century remains controversial, particularly in the case of the Eurasian Sparrowhawk, for  
8 which there are contradictory results concerning its effect on the abundance of potential  
9 prey species. Previous studies of breeding season census data for Sparrowhawks and prey  
10 species in Britain have measured predator abundance either as raw presence-absence data  
11 or as an estimate derived from spatially explicit modelling, and have found little evidence of  
12 association between predator and prey populations. Here, a predator index derived from  
13 site-level binary logistic modelling was used in a regression analysis of breeding census data  
14 on 42 prey species, with significant effects emerging in 27 species (16 positive, 11 negative).  
15 The frequency of significant positive associations may indicate the tracking of prey  
16 abundance by Sparrowhawks, which would tend to cancel out any negative predation effect  
17 on prey populations, rendering it difficult to detect using census data. If so, the negative  
18 effects that have emerged for some species may underestimate the impact of increased  
19 Sparrowhawk numbers on the prey populations concerned. Nevertheless, estimates of the  
20 effect on national populations of prey species, obtained by combining effect sizes with a  
21 measure of the increase in site occupancy by the predator, suggest the possibility of a  
22 substantial impact. It cannot, therefore, be ruled out that the increase in abundance and  
23 range expansion of Sparrowhawks made a significant contribution to contemporaneous  
24 declines in the populations of many of its prey species.

25

## 26 **Introduction**

27 The marked population decline that occurred across a wide range of bird species in the  
28 British Isles during the late 20<sup>th</sup> Century is an event of major conservation concern that  
29 remains imperfectly understood. Consequently, it is still liable to generate controversy,  
30 particularly over the possibility that increased predator populations may have played a role  
31 (Gibbons et al. 2007, Roos et al. 2018). Declines occurred chiefly among songbirds, of which  
32 the major predator in western Europe is the Eurasian Sparrowhawk *Accipiter nisus*  
33 (henceforth 'Sparrowhawk'), a species that increased rapidly in range and abundance during  
34 the same period, following a pesticide-related crash in the 1940s and 50s (Newton 1986).

35 The main source of evidence for population declines in Britain is the Common Birds Census  
36 (CBC), which ran from 1962 to 2000, and involved intensive field survey designed to  
37 estimate the number of breeding territories in a census plot (Marchant 1983). Previous  
38 analyses of CBC data have concluded that there is little evidence for any connection  
39 between increased Sparrowhawk numbers and songbird population declines (Thomson et  
40 al. 1998, Newson et al. 2010), but analyses of data from another census scheme, the Garden  
41 Bird Feeding Survey (GBFS), have consistently found evidence of a negative association  
42 between Sparrowhawks and House Sparrows (Bell et al. 2010, Swallow et al. 2015, 2016,  
43 Jones-Todd 2018).

44 GBFS data is derived from weekly maximum counts made at bird feeding stations over the  
45 winter months (Chamberlain et al. 2005), which can be averaged to derive an annually  
46 varying index of species abundance, with that for Sparrowhawk being effectively the  
47 proportion of weeks during which attacks on a feeding station were observed. The GBFS-  
48 derived Sparrowhawk index may thus be taken to be a continuous measure of predation

49 pressure at a point location, resulting in commensurate declines in the use of the feeder at  
50 that location by potential prey species. CBC data are recorded during the breeding season,  
51 and refer to a much wider area, typically 20-150 ha depending on the habitat, and can  
52 therefore be more reliably used to infer population effects of a predator. However, they  
53 provide a much less precise measure of predator activity, effectively devolving to presence  
54 or absence in any given year.

55 Newson et al. (2010) addressed this problem by using smoothed relative abundance  
56 surfaces to produce year-specific predator indices for each CBC site within their focal area  
57 (England), effectively using broad-scale spatio-temporal trends to estimate variation in local  
58 abundance. However, this approach may fail to capture variation in predator activity at the  
59 narrower scale represented by the area of a typical CBC census plot, accurate  
60 representation of which requires modelling at the individual site level. Here, therefore, I  
61 reprise the approach used by Newson et al. (2010) for a wider range of potential prey  
62 species, using indices of Sparrowhawk activity derived from site-level modelling.

## 63 **Materials and Methods**

### 64 **Model structure**

65 The approach used retains the basic structure of the model used by Newson et al. (2010)  
66 (see appendix), and implements a regression of change in log prey population against  
67 change in a log predator index:

$$68 \quad \ln\left(\frac{\mu_{i,t}}{\mu_{i,1}}\right) = \sum_{j=1}^{t-1} r_j + \alpha \cdot \ln\left(\frac{P_{i,t} + 1}{P_{i,1} + 1}\right) \quad \text{Equation 1}$$

69 where  $\mu_{i,t}$  is estimated prey population and  $P_{i,t}$  an estimate of predator activity in site  $i$  and  
70 year  $t$ ,  $r_j$  is the instantaneous rate of change in global prey population caused by all factors  
71 other than predator activity in year  $j$ , and  $\alpha$  is the effect of the change in the log predator  
72 index ( $\ln(P_{i,t} + 1)$ ) between the first year with site data ( $t=1$ ) and year  $t$ . Change in the log  
73 predator index underestimates change in log predator activity due to the need to  
74 accommodate instances of zero activity by adding one, but remains highly correlated with it.  
75 The model was implemented in R version 3.1.2 (R core team 2014) with prey population as  
76 the response variable, using Poisson errors and a  $\log_e$  link:

77

$$78 \quad \mu_{i,t} = \exp \left[ \sum_{j=1}^{t-1} r_j + \alpha \cdot \ln \left( \frac{P_{i,t} + 1}{P_{i,1} + 1} \right) + \ln \mu_{i,1} \right] \quad \text{Equation 2}$$

79

80 Estimates of  $r_j$  emerge as year effects with each data year represented in the linear model as  
81 a binary variable with the value 1 corresponding to all higher values of  $t$  at site level (i.e. the  
82 effect of previous years is 'present') and otherwise as 0, while  $\ln \mu_{i,1}$  is estimated as a site  
83 effect, with each site represented as a level within a categorical variable (cf. Freeman &  
84 Newson 2008), or in some cases as more than one level to take account of changes in the  
85 size of the area censused. Variance in change in prey population between the first and any  
86 subsequent year with site data is therefore partitioned between the effect of change in  
87 predator activity over the same period, and the effect of conditions in each of the  
88 intervening years. The implementation of Newson et al. (2010) included a number of  
89 additional covariates, which are excluded here for reasons set out in the appendix.

## 90 **Derivation of predator indices**

91 CBC data were supplied by volunteer surveyors as part of a national scheme covering  
92 around 250 plots each year. There was relatively high turnover and a policy of replacing a  
93 lapsed plot with another of similar character, so the number of years surveyed at individual  
94 sites varied considerably. Plots were generally <150 ha, which provides little resolution for  
95 Sparrowhawks as the density of breeding territories is rarely as high as 1 per km<sup>2</sup> (Newton  
96 1986). For practical purposes, therefore, the data for the species emerges as annual  
97 presence or absence at any given CBC site.

98 Such binary data can be viewed as a probabilistic manifestation of continuously varying  
99 Sparrowhawk activity within a census plot, and because any resulting effect on prey  
100 populations will also be continuous, it is appropriate to use the binary predator data to  
101 derive a model of the continuous variation that underlies it. Annual presence and absence  
102 data for Sparrowhawk were therefore modelled at site level using binary logistic regression,  
103 and since this cannot provide meaningful estimates for short runs of data, modelling was  
104 confined to sites in which census data were recorded for at least 5 years. The estimates of  
105 predator activity derived for each site and year were then used as the explanatory variable  
106 ( $P_{i,t}$  in equations 1 and 2) in the analysis of change in prey populations.

107 Both Thomson et al. (1998) and Newson et al. (2010) performed analyses that treat the  
108 Collared Dove *Streptopelia decaocto* as a 'dummy predator' in order to test whether the  
109 methodology used is liable to indicate association where no possibility of predation exists.  
110 Like the Sparrowhawk, the Collared Dove increased rapidly in abundance and expanded its  
111 range during late 20<sup>th</sup> century, during which it newly settled many CBC sites. A further

112 analysis was therefore performed, using indices derived in analogous fashion from Collared  
113 Dove presence and absence data as the explanatory variable in the regression model.

## 114 **Comparison of predator effects with population change**

115 The analysis follows Newson et al. (2010) in using data from the period 1967-2000,  
116 facilitating comparison of results with change in national population estimates, which for  
117 most prey species are available from 1966 onwards (Woodward et al. 2018). Change in  
118 national prey population associated with increased Sparrowhawk numbers was estimated  
119 using prey-specific effect values ( $\alpha_{prey}$ ) in combination with a measure of increase in site  
120 occupation by the predator, calculated as difference between annual means of the log  
121 predator index. The predicted effect on national prey populations ( $R_{prey}$ ) of change in  
122 Sparrowhawk occupation across all sites between 1967 and 2000 is then:

$$123 \quad R_{prey} = \exp\left(\alpha_{prey} \left(\frac{\sum_i \ln(P_{i,2000} + 1)}{n_{2000}} - \frac{\sum_i \ln(P_{i,1967} + 1)}{n_{1967}}\right)\right) \quad \text{Equation 3}$$

124 where  $n_t$  = the number of sites ( $i$ ) contributing predator activity estimates ( $P_{i,t}$ ) in year  $t$ .

## 125 **Results**

126 Effect sizes and their significance are presented in Table 1, and (following Newson et al.  
127 2010) plots of residuals against values of the explanatory variable are shown in  
128 supplementary Figure S1 for prey species with significant effects. Of the 42 species analysed  
129 in relation to Sparrowhawk, 27 showed a significant association, of which 11 were negative

130 Table 1. Estimated effects ( $\alpha$ ) of change in log indices for Sparrowhawk and Collared Dove on log population change among prey species, with  
 131 bold coloured type representing significant positive (blue) or negative (red) effects. Standard errors were estimated using quasipoisson errors  
 132 where the model dispersion (Disp) was >1.4 (indicated by bold type). Following Newson et al. (2010) no adjustment is made to significance  
 133 levels for repeat analyses.

|                          |                                | Sparrowhawk |       |             |               |              |              | Collared Dove |       |             |              |              |              |
|--------------------------|--------------------------------|-------------|-------|-------------|---------------|--------------|--------------|---------------|-------|-------------|--------------|--------------|--------------|
|                          |                                | <i>N</i>    | Sites | Disp        | Effect        | <i>SE</i>    | <i>P</i>     | <i>N</i>      | Sites | Disp        | Effect       | <i>SE</i>    | <i>P</i>     |
| Grey Partridge           | <i>Perdix perdix</i>           | 3139        | 263   | 0.89        | 0.218         | 0.128        | 0.088        | 2984          | 255   | 0.89        | 0.075        | 0.116        | 0.517        |
| Lapwing                  | <i>Vanellus vanellus</i>       | 2839        | 235   | <b>1.67</b> | 0.199         | 0.153        | 0.193        | 2725          | 227   | <b>1.65</b> | -0.104       | 0.127        | 0.413        |
| Collared Dove            | <i>Streptopelia decaocto</i>   | 3866        | 285   | 1.22        | 0.005         | 0.098        | 0.956        |               |       |             |              |              |              |
| Turtle Dove              | <i>Streptopelia turtur</i>     | 3162        | 245   | 1.11        | <b>-0.352</b> | <b>0.121</b> | <b>0.004</b> | 3051          | 239   | 1.11        | -0.008       | 0.114        | 0.942        |
| Great Spotted Woodpecker | <i>Dendrocopos major</i>       | 4780        | 368   | 0.54        | <b>0.535</b>  | <b>0.111</b> | <b>0.000</b> | 4630          | 365   | 0.54        | 0.139        | 0.129        | 0.279        |
| Blue Tit                 | <i>Cyanistes caeruleus</i>     | 7353        | 640   | 1.02        | <b>0.190</b>  | <b>0.026</b> | <b>0.000</b> | 7099          | 629   | 1.03        | <b>0.114</b> | <b>0.029</b> | <b>0.000</b> |
| Great Tit                | <i>Parus major</i>             | 7313        | 634   | 0.87        | <b>0.277</b>  | <b>0.034</b> | <b>0.000</b> | 7054          | 621   | 0.87        | <b>0.113</b> | <b>0.038</b> | <b>0.003</b> |
| Coal Tit                 | <i>Parus ater</i>              | 4853        | 404   | 0.95        | -0.060        | 0.070        | 0.389        | 4692          | 398   | 0.95        | 0.020        | 0.081        | 0.801        |
| Willow Tit               | <i>Poecile montana</i>         | 2144        | 155   | 0.84        | -0.057        | 0.218        | 0.793        | 2076          | 151   | 0.83        | -0.251       | 0.201        | 0.211        |
| Marsh Tit                | <i>Poecile palustris</i>       | 2951        | 245   | 0.80        | <b>0.520</b>  | <b>0.120</b> | <b>0.000</b> | 2837          | 240   | 0.81        | -0.046       | 0.129        | 0.724        |
| Skylark                  | <i>Alauda arvensis</i>         | 4694        | 409   | 1.23        | <b>-0.104</b> | <b>0.040</b> | <b>0.009</b> | 4521          | 399   | 1.23        | 0.027        | 0.041        | 0.516        |
| Long-tailed Tit          | <i>Aegithalos caudatus</i>     | 6112        | 491   | 0.73        | <b>0.717</b>  | <b>0.085</b> | <b>0.000</b> | 5888          | 480   | 0.74        | 0.107        | 0.094        | 0.255        |
| Wood Warbler             | <i>Phylloscopus sibilatrix</i> | 995         | 77    | 1.17        | <b>-0.533</b> | <b>0.244</b> | <b>0.029</b> | 948           | 75    | 1.14        | 0.005        | 0.342        | 0.987        |
| Chiffchaff               | <i>Phylloscopus collybita</i>  | 5755        | 472   | 1.00        | <b>0.328</b>  | <b>0.052</b> | <b>0.000</b> | 5548          | 463   | 1.00        | <b>0.148</b> | <b>0.059</b> | <b>0.012</b> |
| Willow Warbler           | <i>Phylloscopus trochilus</i>  | 7093        | 605   | <b>1.43</b> | <b>0.103</b>  | <b>0.039</b> | <b>0.009</b> | 6847          | 594   | <b>1.41</b> | -0.104       | 0.127        | 0.413        |
| Whitethroat              | <i>Sylvia communis</i>         | 5614        | 481   | 1.25        | <b>0.187</b>  | <b>0.056</b> | <b>0.001</b> | 5343          | 466   | 1.24        | 0.065        | 0.068        | 0.339        |
| Nuthatch                 | <i>Sitta europaea</i>          | 3133        | 246   | 0.72        | -0.071        | 0.105        | 0.499        | 3027          | 241   | 0.73        | <b>0.272</b> | <b>0.118</b> | <b>0.022</b> |
| Treecreeper              | <i>Certhia familiaris</i>      | 4926        | 399   | 0.69        | <b>0.285</b>  | <b>0.098</b> | <b>0.004</b> | 4755          | 391   | 0.69        | -0.103       | 0.114        | 0.367        |
| Wren                     | <i>Troglodytes troglodytes</i> | 7454        | 650   | <b>1.63</b> | <b>0.210</b>  | <b>0.028</b> | <b>0.000</b> | 7194          | 638   | <b>1.65</b> | <b>0.163</b> | <b>0.031</b> | <b>0.000</b> |
| Starling                 | <i>Sturnus vulgaris</i>        | 3877        | 416   | <b>1.66</b> | <b>0.496</b>  | <b>0.089</b> | <b>0.000</b> | 3728          | 405   | <b>1.66</b> | <b>0.384</b> | <b>0.084</b> | <b>0.000</b> |
| Blackbird                | <i>Turdus merula</i>           | 7528        | 658   | 1.10        | 0.016         | 0.022        | 0.480        | 7264          | 646   | 1.08        | 0.042        | 0.023        | 0.070        |



|                    |                             |      |     |             |               |              |              |      |     |             |               |              |              |
|--------------------|-----------------------------|------|-----|-------------|---------------|--------------|--------------|------|-----|-------------|---------------|--------------|--------------|
| Song Thrush        | <i>Turdus philomelus</i>    | 7311 | 632 | 0.96        | <b>-0.316</b> | <b>0.041</b> | <b>0.000</b> | 7053 | 620 | 0.96        | <b>0.132</b>  | <b>0.040</b> | <b>0.001</b> |
| Mistle Thrush      | <i>Turdus viscivorus</i>    | 6479 | 532 | 0.59        | <b>0.324</b>  | <b>0.088</b> | <b>0.000</b> | 6262 | 524 | 0.59        | <b>0.206</b>  | <b>0.088</b> | <b>0.019</b> |
| Spotted Flycatcher | <i>Muscicapa striata</i>    | 4461 | 355 | 0.94        | <b>-0.264</b> | <b>0.128</b> | <b>0.039</b> | 4255 | 348 | 0.93        | 0.220         | 0.124        | 0.077        |
| Robin              | <i>Erithacus rubecula</i>   | 7401 | 644 | 1.33        | <b>0.057</b>  | <b>0.023</b> | <b>0.014</b> | 7143 | 632 | 1.33        | <b>0.132</b>  | <b>0.025</b> | <b>0.000</b> |
| Dunnock            | <i>Prunella modularis</i>   | 7287 | 634 | 1.24        | 0.057         | 0.032        | 0.069        | 7002 | 619 | 1.23        | <b>0.212</b>  | <b>0.032</b> | <b>0.000</b> |
| House Sparrow      | <i>Passer domesticus</i>    | 1869 | 187 | <b>1.84</b> | <b>-0.393</b> | <b>0.114</b> | <b>0.001</b> | 1824 | 182 | <b>1.83</b> | <b>0.706</b>  | <b>0.166</b> | <b>0.000</b> |
| Tree Sparrow       | <i>Passer modularis</i>     | 3148 | 274 | <b>2.22</b> | <b>-0.769</b> | <b>0.157</b> | <b>0.000</b> | 3012 | 265 | <b>2.14</b> | <b>0.351</b>  | <b>0.110</b> | <b>0.001</b> |
| Yellow Wagtail     | <i>Motacilla flava</i>      | 1327 | 104 | 1.06        | <b>-0.741</b> | <b>0.155</b> | <b>0.000</b> | 1256 | 99  | 1.07        | -0.241        | 0.164        | 0.142        |
| Grey Wagtail       | <i>Motacilla cinerea</i>    | 1190 | 95  | 0.70        | <b>0.702</b>  | <b>0.305</b> | <b>0.021</b> | 1133 | 93  | 0.71        | -0.302        | 0.309        | 0.329        |
| Pied Wagtail       | <i>Motacilla alba</i>       | 4186 | 336 | 0.67        | -0.012        | 0.117        | 0.916        | 4055 | 334 | 0.66        | <b>0.316</b>  | <b>0.112</b> | <b>0.005</b> |
| Tree Pipit         | <i>Anthus trivialis</i>     | 1767 | 144 | 0.98        | <b>0.528</b>  | <b>0.201</b> | <b>0.009</b> | 1725 | 144 | 0.99        | 0.229         | 0.173        | 0.187        |
| Meadow Pipit       | <i>Anthus pratensis</i>     | 2099 | 165 | <b>1.51</b> | 0.096         | 0.122        | 0.433        | 2038 | 164 | <b>1.46</b> | <b>-0.423</b> | <b>0.139</b> | <b>0.002</b> |
| Chaffinch          | <i>Fringilla coelebs</i>    | 7328 | 634 | 1.10        | <b>0.186</b>  | <b>0.024</b> | <b>0.000</b> | 7070 | 621 | 1.10        | 0.045         | 0.026        | 0.087        |
| Bullfinch          | <i>Pyrrhula pyrrhula</i>    | 6179 | 496 | 0.73        | <b>-0.151</b> | <b>0.076</b> | <b>0.046</b> | 5955 | 484 | 0.73        | <b>0.150</b>  | <b>0.076</b> | <b>0.049</b> |
| Greenfinch         | <i>Chloris chloris</i>      | 6069 | 511 | 1.17        | <b>-0.244</b> | <b>0.055</b> | <b>0.000</b> | 5802 | 494 | 1.16        | <b>0.290</b>  | <b>0.054</b> | <b>0.000</b> |
| Linnet             | <i>Linaria cannabina</i>    | 5298 | 447 | <b>1.47</b> | -0.028        | 0.069        | 0.687        | 5120 | 439 | <b>1.46</b> | <b>0.208</b>  | <b>0.071</b> | <b>0.003</b> |
| Redpoll            | <i>Acanthis cabaret</i>     | 2669 | 208 | 1.23        | <b>-1.243</b> | <b>0.176</b> | <b>0.000</b> | 2597 | 206 | 1.27        | 0.260         | 0.140        | 0.063        |
| Goldfinch          | <i>Carduelis carduelis</i>  | 4941 | 398 | 1.05        | 0.005         | 0.087        | 0.955        | 4755 | 390 | 1.04        | <b>0.386</b>  | <b>0.090</b> | <b>0.000</b> |
| Corn Bunting       | <i>Emberiza calandra</i>    | 1404 | 112 | 1.22        | -0.105        | 0.152        | 0.491        | 1356 | 108 | 1.23        | -0.178        | 0.126        | 0.156        |
| Yellowhammer       | <i>Emberiza citrinella</i>  | 5231 | 438 | 1.18        | 0.083         | 0.043        | 0.055        | 5022 | 427 | 1.17        | <b>0.203</b>  | <b>0.049</b> | <b>0.000</b> |
| Reed Bunting       | <i>Emberiza schoeniclus</i> | 3671 | 310 | 1.20        | 0.004         | 0.071        | 0.953        | 3528 | 305 | 1.19        | <b>0.217</b>  | <b>0.065</b> | <b>0.001</b> |

135 and 16 positive. Of the 41 species analysed in relation to Collared Dove, 20 showed a  
136 significant association, of which 1 was negative and 19 positive. The trend in site occupation  
137 by Sparrowhawks is shown in Figure 1, with best-fit values for 1967 and 2000 of 0.067 and  
138 0.438, respectively, denoting an increase of 0.371. The predicted change in national  
139 populations of prey species as a result of this increase and prey-specific predator effects is  
140 shown in Figure 2, alongside actual population change.

141 Figure 1. Trend in the annual mean of  $\ln(P_{i,t}+1)$  based on values of  $P_{i,t}$  derived from site-level  
142 models of Sparrowhawk activity within CBC census sites. The trend line  $\pm 2$  standard errors  
143 was fitted using the loess smoother of the GAM package in R using a span of 0.2.

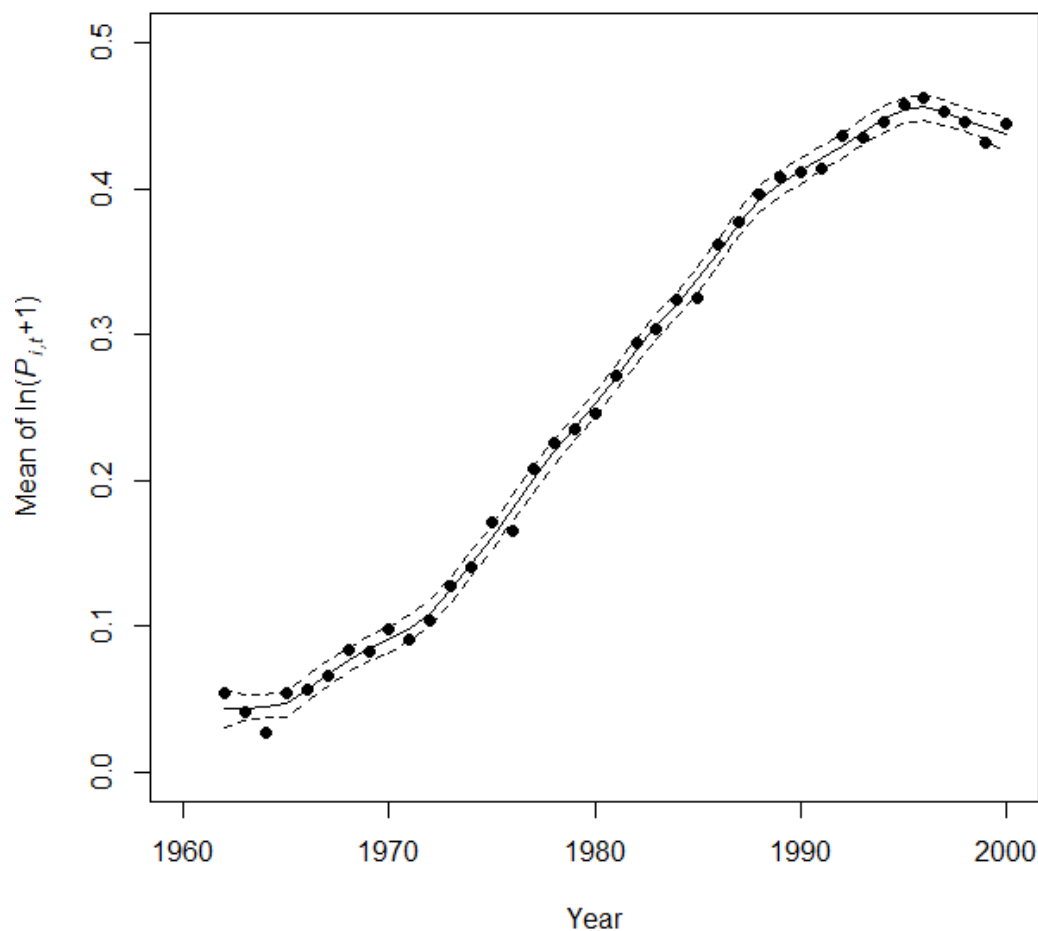

145 Figure 2. Species population change compared with that predicted on the basis of prey  
146 specific effects and change in site occupation by Sparrowhawks. Bars represent actual  
147 population change (Woodward et al. 2018), and dots show predicted population change  $\pm$  2  
148 standard errors. The time interval for actual population change is 1967-2000 except for  
149 species for which population estimates start later than 1967, i.e. Collared Dove (1971),  
150 House Sparrow (1976) Wood Warbler (1994), and Grey Wagtail (1974). There is a significant  
151 positive association between predicted and actual change (Kendall's  $\tau = 0.238$ ,  $P=0.026$ ).

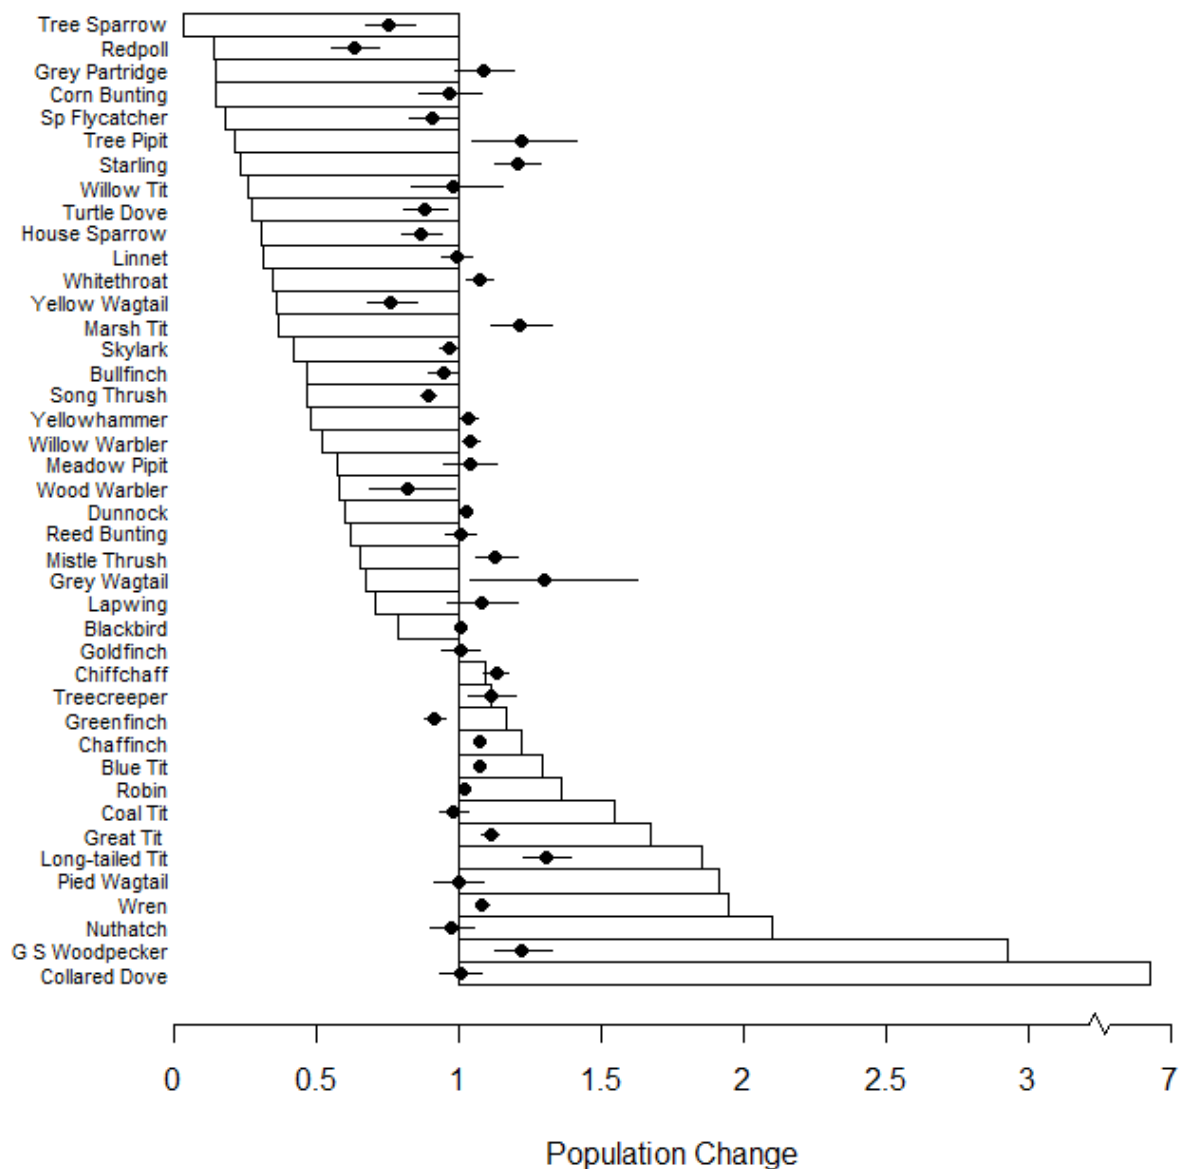

## 153 **Discussion**

154 The resurgence of the population of Sparrowhawks in Britain, following the pesticide-  
155 related mid-20<sup>th</sup> century population crash, has the character of a quasi-experiment in which  
156 a major predator of adult songbirds re-settled a wide area from which it had been removed.  
157 This occurred in a place and period with a well-established system of songbird population  
158 monitoring, which also provided some data on the expanding distribution of the predator.  
159 The data available for Sparrowhawk are very limited, however, and may be misleading if  
160 taken at face value, as in the analysis of Thomson et al. (1998), who regressed territory  
161 counts of a number of potential prey species against a binary measure of Sparrowhawk  
162 presence and absence. This was recognised by Newson et al. (2010), who instead used a  
163 modelling approach to derive year-specific site estimates of relative Sparrowhawk activity  
164 from interpolated annual abundance surfaces. Again, however, there is reason to doubt  
165 whether such estimates reflect the true situation on the ground.

166 The level of predation experienced by a local bird community is directly related to the  
167 breeding status of Sparrowhawks within the locality, since the heaviest predation pressure  
168 occurs during the breeding season, when over 20 prey deliveries can be made to a nest per  
169 day (Newton 1986). The level of predator activity will generally decline at greater distances  
170 from the nest (Newton 1986), so predation within a census site will vary with its distance to  
171 local nest sites. The predator may then be recorded as present on the basis of anything from  
172 an occasional foray to a census site on the periphery of a hunting range, to a consistently  
173 high level of hunting pressure from a pair with a nest within or adjacent to the plot. Equally,  
174 given the elusive nature of the species, it may be that quite a high level of activity is

175 required to guarantee observation of the species at a site, in which case it may be recorded  
176 as absent even when significant predation is taking place.

177 Regressing prey population data against raw predator presence-absence data therefore has  
178 obvious potential to produce misleading results. However, this also applies to spatial  
179 modelling based on presence/absence within census sites that are typically tens of  
180 kilometres apart, as although this provides a picture of varying density at a commensurate  
181 scale, it cannot represent variation in activity at the sub-kilometre scale of a typical census  
182 plot. To do so requires independent modelling of data from individual sites, though  
183 confidence in model estimates can only be achieved for sites with a reasonable sequence of  
184 data. The benefits of site-level modelling therefore trade off against loss of data from short-  
185 lived sites, all of which can be utilised by spatial modelling. However, the results strongly  
186 suggest that this is worthwhile, since the predictive power of the predator indices so  
187 derived is vastly improved over those of previous studies.

188 The frequency of significant positive associations with both Sparrowhawk and Collared Dove  
189 suggests that, despite the rapid increase and spread of both species, much of the variance in  
190 recorded presence within sites is still related to temporal variation in habitat quality.

191 Collared Dove may therefore be responding to habitat changes in parallel with other  
192 species, while Sparrowhawk may also be responding directly to changes in prey species  
193 abundance. For Collared Dove especially, therefore, a significant degree of overlap in  
194 habitat requirements is a prerequisite for a positive association to emerge, and this may  
195 explain the single instance of a negative association with Meadow Pipit. This is a species that  
196 concentrates in rough grass and heathland in upland and coastal areas, contrasting with  
197 Collared Dove's preference for the environs of human habitation, so overlap between the

198 two species will often be in habitats that are marginal to both. A negative association may  
199 therefore arise as the declining Meadow Pipit population withdraws from mutually marginal  
200 habitats while the growing Collared Dove population expands into them.

201 It is impossible to rule out a similar explanation for the 11 negative associations that  
202 emerged for Sparrowhawk. However, given the frequency and in many cases the strength of  
203 these associations, an inference of direct interaction in the form of a predation effect may  
204 be more parsimonious, especially given the lack of obvious contrasts in habitat between  
205 Sparrowhawk and many of the negatively associated species. Such direct interaction does  
206 not preclude the occurrence of positive covariance caused by temporal variation in habitat  
207 quality, and the net association that emerges may therefore depend on the relative  
208 importance of the two opposing sources of covariance. Positive associations may emerge for  
209 species that are less affected by predation, and negative associations only where the impact  
210 of predation is sufficiently high to outweigh the effect of prey abundance tracking by the  
211 predator. This may in turn explain why the magnitude of actual population change is  
212 generally much larger than that predicted on the basis of increased site occupation by the  
213 predator despite the cross-species correlation between the two.

214 The effects reported here may therefore underestimate the negative impact of increased  
215 Sparrowhawk numbers on the abundance of prey species. Even so they indicate that  
216 increased Sparrowhawk numbers are often associated with a more negative prey population  
217 trajectory, predicting declines of almost a quarter in Tree Sparrow and Yellow Wagtail, and  
218 of more than a third in Redpoll. They also predict a decline in the Greenfinch, which  
219 increased in abundance over the relevant period, suggesting that its increase might have  
220 been substantially greater without the effect of increased Sparrowhawk abundance.

221 Whether or not the negative associations indicate a predation effect it is clear, contrary to  
222 the conclusions of previous studies such as those of Thomson et al. (1998) and Newson et al.  
223 (2010), that association between population change in Sparrowhawk and potential prey  
224 species was the rule in late 20<sup>th</sup> century Britain rather than the exception. This has wider  
225 implications owing to the influence of Newson et al. (2010) on the conclusions of recent  
226 reviews such as Madden et al. (2015) and Roos et al. (2018), since the very large number of  
227 predator-prey cases covered by Newson et al. tends to overpower the influence of other  
228 studies. Furthermore, if negative outcomes of increased predation are indeed being  
229 cancelled out by correlated changes in abundance caused by a common response across  
230 species to environmental variation, this may severely limit the utility of census data for  
231 investigation of ecological interactions between species, including competition.  
232 Nevertheless, the negative associations with Sparrowhawk that have emerged from this  
233 study are most readily interpreted, given their strength and frequency, as evidence of  
234 depression of prey populations as a result of the predator's increased abundance and  
235 ubiquity, and establish at the very least that such an effect cannot be dismissed as unlikely.

## 236 **Supplementary Information**

237 Figure S1. Plots of residuals against change in log predator indices for prey species with  
238 significant predator effects.

## 239 **Data Accessibility**

240 Access to Common Birds Census data was purchased under licence from the British Trust for  
241 Ornithology on condition of no disclosure to third parties.

## 242 **Acknowledgements**

243 Funding and moral support were provided by SongBird Survival, with special thanks to Keith  
244 Cowieson and Nick Forde.

## 245 **References**

- 246 Bell, C.P., Baker, S.W., Parkes, N.G., Brooke M. de L., and Chamberlain, D.E 2010. The role of  
247 the Eurasian Sparrowhawk (*Accipiter nisus*) in the decline of the House Sparrow (*Passer*  
248 *domesticus*) in Britain. *The Auk* 127: 411-420.
- 249 Chamberlain, D.E., Vickery, J.A., Glue, D.E., Robinson, R.A., Conway, G.J., Woodburn, R.J.W.  
250 and Cannon, A.R. 2005. Annual and seasonal trends in the use of garden feeders by birds in  
251 winter. *Ibis* 147: 563-575.
- 252 Chamberlain, D. E., Glue, D.E. and Toms, M.P. 2009. Sparrowhawk *Accipiter nisus* presence  
253 and winter bird abundance. *Journal of Ornithology* 150:247-254.
- 254 Freeman, S.N. & Newson, S.E. 2008. On a log-linear approach to detecting ecological  
255 interactions in monitored populations. *Ibis* 150: 250-258.
- 256 Gibbons, D.W., Amar, A., Anderson G.Q.M, Bolton, B., Bradbury, R., Eaton, M.A., Evans, A.D.,  
257 Grant, M.C., Gregory, R.D., Hilton, G.M., Hirons G.J.M., Hughes, J., Johnstone, I., Newbery,  
258 P., Peach, W.J., Ratcliffe, N., Smith, K.W., Summers R.W., Walton, P. & Wilson J.D. (2007) *The*  
259 *predation of wild birds in the UK: a review of its conservation impact and management*.  
260 Research Report no 23, RSPB, Sandy.



- 261 Jones-Todd, C. M., Swallow, B., Illian, J.B., and Toms, M. 2017. A spatiotemporal  
262 multispecies model of a semicontinuous response. *Journal of the Royal Statistical Society,*  
263 *Series C* 67: 705-722.
- 264 Madden, C. F., Arroyo, B. & Amar, A. 2015. A review of the impacts of corvids on bird  
265 productivity and abundance. *Ibis* 157: 1–16.
- 266 Marchant, J.H. 1983. *BTO Common Birds Census Instructions*. British Trust for Ornithology.
- 267 Newton, I. 1986. *The Sparrowhawk*. Poyser.
- 268 Newson, S.E., Rextad, E.A, Baillie, S.R., Buckland, S.T & Aebischer, N.J. 2010. Population  
269 change of avian predators and grey squirrels in England: is there any evidence for an impact  
270 on avian prey populations? *Journal of Applied Ecology* 47: 244-252.
- 271 R Core Team. 2014. *R: A language and environment for statistical computing*. R Foundation  
272 for Statistical Computing, Vienna, Austria. URL <http://www.R-project.org/>.
- 273 Roos, S., Smart, J., Gibbons, D.W. & Wilson, J.D. 2018. A review of predation as a limiting  
274 factor for bird populations in mesopredator-rich landscapes: a case study of the UK.  
275 *Biological Reviews* 93: 1915-1937
- 276 Swallow, B., Buckland, S.T., King, R., and Toms, M.P. 2015. Bayesian hierarchical modelling  
277 of continuous non-negative longitudinal data with a spike at zero: An application to a study  
278 of birds visiting gardens in winter. *Biometrical Journal* 58: 357-371.
- 279 Swallow, B., King, R., Buckland, S.T. & Toms, M.P. 2016. Identifying multispecies synchrony  
280 in response to environmental covariates. *Ecology and Evolution* 6: 8515-8525

281 Thomson, D. L., Green, R.E., Gregory, R.D., and Baillie, S.R. 1998. The widespread declines of  
282 songbirds in rural Britain do not correlate with the spread of their avian predators.  
283 Proceedings of the Royal Society, Series B 265: 2057-2062.

284 Woodward, I.D., Massimino, D., Hammond, M.J., Harris, S.J., Leech, D.I., Noble, D.G.,  
285 Walker, R.H., Barimore, C., Dadam, D., Eglington, S.M., Marchant, J.H., Sullivan, M.J.P.,  
286 Baillie, S.R. & Robinson, R.A. 2018. BirdTrends 2018: trends in numbers, breeding success  
287 and survival for UK breeding birds. Research Report 708. BTO, Thetford.  
288 [www.bto.org/birdtrends](http://www.bto.org/birdtrends)

## 289 Appendix

290 The linear model used in Newson et al. (2010) included covariates in the form of measures  
 291 of change in a number of additional predator indices, and in overall prey biomass, annual  
 292 climatic averages, and bird detectability, viz.:

293

$$\begin{aligned}
 294 \quad E[N_{i,t}] = & \exp \left[ \sum_{j=1}^{t-1} r_j + \alpha_{Squirrel} \cdot \ln \left( \frac{P_{Squirrel,i,t} + 1}{P_{Squirrel,i,1} + 1} \right) + \alpha_{Crow} \cdot \ln \left( \frac{P_{Crow,i,t} + 1}{P_{Crow,i,1} + 1} \right) \right. \\
 295 & + \alpha_{Magpie} \cdot \ln \left( \frac{P_{Magpie,i,t} + 1}{P_{Magpie,i,1} + 1} \right) + \alpha_{Jay} \cdot \ln \left( \frac{P_{Jay,i,t} + 1}{P_{Jay,i,1} + 1} \right) \\
 296 & + \alpha_{Woodpecker} \cdot \ln \left( \frac{P_{Woodpecker,i,t} + 1}{P_{Woodpecker,i,1} + 1} \right) + \alpha_{Hawk} \cdot \ln \left( \frac{P_{Hawk,i,t} + 1}{P_{Hawk,i,1} + 1} \right) \\
 297 & + \alpha_{Kestrel} \cdot \ln \left( \frac{P_{Kestrel,i,t} + 1}{P_{Kestrel,i,1} + 1} \right) + \alpha_{Buzzard} \cdot \ln \left( \frac{P_{Buzzard,i,t} + 1}{P_{Buzzard,i,1} + 1} \right) \\
 298 & + \alpha_{Dove} \cdot \ln \left( \frac{P_{Dove,i,t} + 1}{P_{Dove,i,1} + 1} \right) + \beta \cdot \ln \left( \frac{Biomass_{i,t}}{Biomass_{i,1}} \right) \\
 299 & + \gamma_{STemp} \cdot \ln \left( \frac{W_{STemp,i,t}}{W_{STemp,i,1}} \right) + \gamma_{SRain} \cdot \ln \left( \frac{W_{SRain,i,t}}{W_{SRain,i,1}} \right) \\
 300 & + \gamma_{WTemp} \cdot \ln \left( \frac{W_{WTemp,i,t}}{W_{WTemp,i,1}} \right) + \gamma_{WRain} \cdot \ln \left( \frac{W_{WRain,i,t}}{W_{WRain,i,1}} \right) + \ln(N_{i,1}) \\
 301 & \left. + \ln \left( \frac{\hat{P}_t}{\hat{P}_1} \right) \right]
 \end{aligned}$$

302 where *STemp* = mean daily minimum summer temperature, *WTemp* = mean daily minimum  
 303 winter temperature, *SRain* = number of summer days with rainfall, *WRain* = number of  
 304 winter days with rainfall, and  $\hat{P}$  = prey species detection probability. The detectability

305 variable was used only in their analysis of Breeding Bird Survey data, and will not be  
306 considered further.

307 The rationale for using indices of change in predator activity as explanatory variables rather  
308 than simple measures of predator activity in any given year, as in Thomson et al. (1998) and  
309 Chamberlain et al. (2009), is that the response of prey populations is likely to be density-  
310 dependent. If there is an episodic increase in predator presence at a site, an affected prey  
311 population will decrease, but then re-establish stability at a lower level. Consequently, zero  
312 change in prey populations will correspond with both low and high levels of the predator,  
313 and the regression will indicate no association (Newson et al. 2010). By contrast, change in  
314 predator activity returns to zero after the increase and therefore has a linear negative  
315 relationship with prey population change.

316 It may be safe to assume that this applies to all monotonic changes in predator activity  
317 (including declines) to a reasonable approximation, even if the prey population shows a  
318 lagged response, since the effect of each annual change will tend to reinforce that of the  
319 last. If lags do occur it may not be so safe in the case of fluctuating predator populations,  
320 especially if the fluctuations are abrupt, but this is not an issue with the present application  
321 since reversals in the trend of Sparrowhawk activity are rare to non-existent, and in any case  
322 the logistic model used to derive the predator index assumes a monotonic trend.

323 The same does not apply to some of the other change indices included in the linear model  
324 of Newson et al. (2010), particularly those relating to weather, as seasonal means in  
325 temperature and rainfall fluctuate more or less randomly about their long-term average. In  
326 addition, prey populations are unlikely to respond symmetrically to changes of equivalent  
327 magnitude in the opposite direction, e.g. a decline caused by severe winter may not be

328 immediately reversed by an average winter or even by a mild one. Consequently,  
329  $\ln\left(\frac{W_{WTemp,t,t}}{W_{WTemp,i,1}}\right)$  may bear little relation to the aggregate effect of weather between years 1

330 and t, and the same applies to change indices derived from the other weather variables.

331 Even if this were not so, the weather variables would be largely redundant, since variance in  
332 prey populations related to annual variation in weather conditions is explained by the  $\sum r_j$   
333 term in the model. The various weather terms could therefore account only for variance  
334 among sites related to differences from national average weather conditions over any given  
335 period. Given the geographic scale of the study, such differences will be minor, and will  
336 converge rapidly on the long-term average over lengthening time intervals, so are unlikely  
337 to have any additive explanatory power in relation to spatio-temporal variation in prey  
338 populations.

339 The rationale for including measures of change in a range of predatory species is that all of  
340 the predators included have increased their abundance, and therefore change in predator  
341 abundance within census sites may be correlated. Independently-measured covariance  
342 between an individual predator and a prey species may therefore be partially attributable to  
343 the impact of the correlated predators. However, Newson et al. (2010) report low variance  
344 inflation factors for the predator variables in their analysis, indicating low multicollinearity,  
345 and it is therefore unlikely that the effect sizes reported here have been amplified by the  
346 absence of covariates representing the abundance of other predators.

347 The reason given for including measures of change in overall prey biomass is that it 'may  
348 buffer against impact on the prey species of interest'. This assumes that the change in focal  
349 species abundance caused by a change in predation is likely to be inversely related to the

350 simultaneous change in alternative prey abundance, which may be true if the two are  
351 coupled solely through the action of the predator. However, change in environmental  
352 factors such as weather, habitat and predation are likely to have similar effects across  
353 species, in which case change in overall prey biomass will be correlated with change in focal  
354 prey abundance. Inclusion of the former as a predictive variable will therefore partition out  
355 much of the variance in the latter, including that attributable to predation, and its inclusion  
356 in the linear model is therefore problematic.
